# Supplementary material for: Ab initio insight into furan conversion to levulinate ester in reaction with methylal and methanol
Source: Royal Society of Chemistry journal article supplement (doi:10.1039/d4ma00446a), 2024-01-01
Supplement: d4ma00446a1.pdf [file d4ma00446a1.pdf]

## Electronic Supplementary Information – Ab initio insight into furan conversion to levulinate ester in reaction with methylal and methanol

Yun-Sim Kim, Ryong-Wan Ham, Yong-Chol Pak, Man-Sok O, Chol-Jun Yu\*

*Computational Materials Design, Faculty of Materials Science, Kim Il Sung University,  
Pyongyang, PO Box 76, Democratic People's Republic of Korea*

Table S1. The bond lengths (unit: Å), bond angles (unit: degree), and dipole moment ( $\mu$ ) of 2-methoxymethyl-furan (MMF), optimized by using different methods such as pseudo-atomic orbital-double zeta polarization (PAO-DZP) method with supercell modeling without (Vac.) and with 25 and 40 methanol solvent molecules (Met-25 and Met-40) using PBE exchange-correlation functional as implemented in SIESTA package and all-electron atomic orbital B3LYP/6-311+G\* method with cluster modeling without (Vac.) and with methanol solvent effect (Met.) as implemented in NWChem package.

|           | PBE/DZP |        |        | B3LYP/6-311+G* |       |
|-----------|---------|--------|--------|----------------|-------|
|           | Vac.    | Met-25 | Met-40 | Vac.           | Met.  |
| O1–C1     | 1.365   | 1.371  | 1.359  | 1.361          | 1.365 |
| O1–C4     | 1.369   | 1.376  | 1.365  | 1.374          | 1.377 |
| C1–C2     | 1.354   | 1.357  | 1.352  | 1.359          | 1.359 |
| C2–C3     | 1.407   | 1.409  | 1.403  | 1.432          | 1.434 |
| C3–C4     | 1.362   | 1.362  | 1.359  | 1.363          | 1.363 |
| C4–C5     | 1.470   | 1.474  | 1.463  | 1.493          | 1.491 |
| C5–O2     | 1.421   | 1.417  | 1.418  | 1.425          | 1.436 |
| O2–C6     | 1.413   | 1.426  | 1.405  | 1.417          | 1.426 |
| C1–H1     | 1.071   | 1.071  | 1.073  | 1.078          | 1.078 |
| C2–H2     | 1.067   | 1.070  | 1.068  | 1.080          | 1.080 |
| C3–H3     | 1.077   | 1.079  | 1.068  | 1.080          | 1.081 |
| C5–H4     | 1.101   | 1.104  | 1.100  | 1.099          | 1.097 |
| C5–H5     | 1.088   | 1.091  | 1.084  | 1.091          | 1.090 |
| C6–H6     | 1.098   | 1.098  | 1.098  | 1.090          | 1.090 |
| C6–H7     | 1.098   | 1.098  | 1.094  | 1.099          | 1.095 |
| C6–H8     | 1.120   | 1.117  | 1.121  | 1.096          | 1.096 |
| C1–O1–C4  | 105.6   | 106.1  | 105.7  | 107.3          | 107.4 |
| O1–C1–C2  | 110.8   | 110.1  | 110.7  | 110.5          | 110.3 |
| C1–C2–C3  | 106.8   | 107.1  | 106.8  | 106.0          | 106.2 |
| C2–C3–C4  | 106.1   | 106.5  | 106.1  | 106.9          | 106.9 |
| C3–C4–C5  | 127.6   | 127.7  | 128.4  | 133.3          | 133.0 |
| C4–C5–O2  | 110.6   | 109.2  | 110.1  | 115.0          | 114.5 |
| C5–O2–C6  | 110.2   | 108.8  | 108.5  | 114.2          | 113.9 |
| $\mu$ (D) |         |        |        | 1.29           | 1.27  |

\*Corresponding author: Chol-Jun Yu, Email: cj.yu@ryongnamsan.edu.kp

Table S2. The bond lengths (unit: Å), bond angles (unit: degree), and dipole moment ( $\mu$ ) of methyl levulinate (MLA), optimized by using different methods such as PBE/DZP with supercell modeling and B3LYP/6-311+G\* method with cluster modeling.

|           | PBE/DZP |        |        | B3LYP/6-311+G* |       |
|-----------|---------|--------|--------|----------------|-------|
|           | Vac.    | Met-25 | Met-40 | Vac.           | Met.  |
| C1-C2     | 1.518   | 1.503  | 1.508  | 1.513          | 1.509 |
| C2-C3     | 1.537   | 1.537  | 1.537  | 1.532          | 1.521 |
| C3-C4     | 1.545   | 1.550  | 1.551  | 1.546          | 1.549 |
| C4-C5     | 1.523   | 1.507  | 1.520  | 1.524          | 1.517 |
| C5-O3     | 1.381   | 1.336  | 1.366  | 1.356          | 1.343 |
| C6-O3     | 1.436   | 1.448  | 1.433  | 1.432          | 1.448 |
| C2-O1     | 1.212   | 1.232  | 1.220  | 1.211          | 1.221 |
| C5-O2     | 1.208   | 1.226  | 1.212  | 1.203          | 1.216 |
| C1-H1     | 1.092   | 1.095  | 1.120  | 1.095          | 1.093 |
| C1-H2     | 1.097   | 1.107  | 1.129  | 1.089          | 1.090 |
| C1-H3     | 1.103   | 1.111  | 1.120  | 1.094          | 1.094 |
| C3-H4     | 1.107   | 1.125  | 1.115  | 1.098          | 1.096 |
| C3-H5     | 1.116   | 1.125  | 1.109  | 1.092          | 1.092 |
| C4-H6     | 1.090   | 1.102  | 1.095  | 1.092          | 1.088 |
| C4-H7     | 1.120   | 1.097  | 1.093  | 1.091          | 1.091 |
| C6-H8     | 1.099   | 1.115  | 1.108  | 1.091          | 1.089 |
| C6-H9     | 1.131   | 1.100  | 1.098  | 1.093          | 1.089 |
| C6-H10    | 1.096   | 1.104  | 1.098  | 1.088          | 1.087 |
| C1-C2-C3  | 116.8   | 118.9  | 115.5  | 118.0          | 117.8 |
| O1-C2-C3  | 120.6   | 119.8  | 121.5  | 119.9          | 120.7 |
| C2-C3-C4  | 112.1   | 112.8  | 113.7  | 116.4          | 114.9 |
| C3-C4-C5  | 106.1   | 110.4  | 110.0  | 112.6          | 111.2 |
| C4-C5-O3  | 121.1   | 119.3  | 117.1  | 119.3          | 120.4 |
| O2-C5-O3  | 118.3   | 118.9  | 120.1  | 118.6          | 117.8 |
| C5-O3-C6  | 123.0   | 120.3  | 118.7  | 122.3          | 122.2 |
| $\mu$ (D) |         |        |        | 5.68           | 6.51  |

Table S3. The bond lengths (unit: Å) and bond angles (unit: degree) of furan, DMM, MMF and MLA optimized by using PBE/6-311+G\* method with cluster modeling.

| Furan    | DMM   | MMF            | MLA            |                |
|----------|-------|----------------|----------------|----------------|
| O-C1     | 1.404 | C1-O1 1.471    | O1-C1 1.401    | C1-C2 1.556    |
| C1-C2    | 1.385 | C2-O1 1.449    | O1-C4 1.418    | C2-C3 1.576    |
| C2-C3    | 1.464 | C2-O2 1.449    | C1-C2 1.386    | C3-C4 1.590    |
| C1-H1    | 1.096 | C3-O2 1.471    | C2-C3 1.459    | C4-C5 1.566    |
| C2-H2    | 1.099 | C1-H3 1.118    | C3-C4 1.391    | C5-O3 1.404    |
| C1-O-C1  | 106.3 | C1-H4 1.109    | C4-C5 1.522    | C6-O3 1.484    |
| C1-C2-C3 | 106.4 | C1-H5 1.114    | C5-O2 1.479    | C2-O1 1.235    |
| C1-C2-H2 | 126.4 | C2-H1 1.115    | O2-C6 1.464    | C5-O2 1.227    |
| O-C1-C2  | 110.4 | C2-H2 1.115    | C1-H1 1.097    | C1-H1 1.115    |
| O-C1-H1  | 115.1 | C3-H6 1.118    | C2-H2 1.099    | C1-H2 1.110    |
|          |       | C3-H7 1.109    | C3-H3 1.100    | C1-H3 1.114    |
|          |       | C3-H8 1.114    | C5-H4 1.118    | C3-H4 1.118    |
|          |       | C1-O1-C2 114.2 | C5-H5 1.111    | C3-H5 1.111    |
|          |       | O1-C2-O2 114.9 | C6-H6 1.119    | C4-H6 1.111    |
|          |       | C3-O2-C2 114.2 | C6-H7 1.110    | C4-H7 1.111    |
|          |       | H1-C2-O2 111.0 | C6-H8 1.116    | C6-H8 1.111    |
|          |       | H2-C2-O2 104.5 | C1-O1-C4 106.8 | C6-H9 1.112    |
|          |       | H6-C3-O2 110.8 | O1-C1-C2 110.5 | C6-H10 1.107   |
|          |       | H7-C3-O2 105.8 | C1-C2-C3 106.3 | C1-C2-C3 118.2 |
|          |       | H8-C3-O2 111.6 | C2-C3-C4 107.3 | O1-C2-C3 120.0 |
|          |       | H3-C1-O1 110.8 | C3-C4-C5 133.7 | C2-C3-C4 116.9 |
|          |       | H4-C1-O1 105.8 | C4-C5-O2 115.3 | C3-C4-C5 113.2 |
|          |       | H5-C1-O1 111.6 | C5-O2-C6 114.4 | C4-C5-O3 120.0 |
|          |       |                |                | O2-C5-O3 117.7 |
|          |       |                |                | C5-O3-C6 122.6 |

Table S4. The bond lengths (unit: Å), bond angles (unit: degree), and dipole moment ( $\mu$ ) of methanol, optimized by using different methods such as PBE/DZP with supercell modeling and B3LYP/6-311+G\* method with cluster modeling, in comparison with the experimental (Exp.) values.

|           | PBE/DZP |        |        | B3LYP/6-311+G* |       |                   |
|-----------|---------|--------|--------|----------------|-------|-------------------|
|           | Vac.    | Met-25 | Met-40 | Vac.           | Met.  | Exp. <sup>a</sup> |
| C–O       | 1.410   | 1.437  | 1.423  | 1.422          | 1.432 | 1.425             |
| C–H       | 1.085   | 1.109  | 1.104  | 1.095          | 1.093 | 1.094             |
| O–H       | 0.970   | 0.991  | 0.979  | 0.964          | 0.966 | 0.945             |
| C–O–H     | 114.1   | 109.5  | 107.1  | 109.5          | 108.8 | 108.5             |
| H–C–H     | 104.6   | 110.0  | 107.6  | 108.5          | 108.9 | 108.6             |
| $\mu$ (D) |         |        |        | 1.97           | 2.01  | 1.70              |

<sup>a</sup> D. R. Lide, CRC Handbook of Chemistry and Physics, CRC Press, Boca Raton, FL, 2005.

Table S5. The bond length (unit: Å), bond angle (unit: degree), and dipole moment ( $\mu$ ) of water molecule, optimized by using different methods such as PBE/DZP with supercell modeling and B3LYP/6-311+G\* method with cluster modeling, in comparison with the experimental (Exp.) values.

|           | PBE/DZP |        |        | B3LYP/6-311+G* |       |                   |
|-----------|---------|--------|--------|----------------|-------|-------------------|
|           | Vac.    | Met-25 | Met-40 | Vac.           | Met.  | Exp. <sup>a</sup> |
| O–H       | 0.969   | 0.996  | 0.969  | 0.964          | 0.965 | 0.957             |
| H–O–H     | 105.3   | 106.3  | 104.8  | 107.0          | 106.3 | 104.5             |
| $\mu$ (D) |         |        |        | 2.35           | 2.37  | 1.85              |

<sup>a</sup> D. R. Lide, CRC Handbook of Chemistry and Physics, CRC Press, Boca Raton, FL, 2005.

Table S6. Fukui indices for electrophilic attack ( $f^-$ ), nucleophilic attack ( $f^+$ ) and radical attack ( $f^0$ ), and corresponding atomic charges in Mulliken (Mull.) and Hirshfeld (Hirsh.) approaches for reactant molecules.

|          | $f^-$  |        | Atomic charge |         | $f^+$  |        | Atomic charge |         | $f^0$  |        |
|----------|--------|--------|---------------|---------|--------|--------|---------------|---------|--------|--------|
|          | Mull.  | Hirsh. | Mull.         | Hirsh.  | Mull.  | Hirsh. | Mull.         | Hirsh.  | Mull.  | Hirsh. |
| Furan    |        |        |               |         |        |        |               |         |        |        |
| O        | 0.050  | 0.073  | -0.430        | -0.1027 | 0.070  | 0.128  | -0.442        | -0.1228 | 0.060  | 0.100  |
| C1       | 0.204  | 0.203  | 0.145         | 0.0269  | 0.226  | 0.180  | 0.102         | -0.0114 | 0.215  | 0.192  |
| C2       | 0.100  | 0.130  | -0.134        | -0.0675 | 0.082  | 0.120  | -0.152        | -0.0925 | 0.091  | 0.125  |
| C3       | 0.100  | 0.129  | -0.140        | -0.0671 | 0.081  | 0.120  | -0.158        | -0.0921 | 0.091  | 0.125  |
| C4       | 0.201  | 0.202  | 0.202         | 0.0273  | 0.225  | 0.181  | 0.159         | -0.0110 | 0.213  | 0.192  |
| H1       | 0.091  | 0.073  | 0.118         | 0.0766  | 0.084  | 0.079  | 0.101         | 0.0615  | 0.088  | 0.076  |
| H2       | 0.082  | 0.058  | 0.109         | 0.0650  | 0.074  | 0.057  | 0.093         | 0.0535  | 0.078  | 0.057  |
| H3       | 0.081  | 0.058  | 0.109         | 0.0653  | 0.074  | 0.057  | 0.094         | 0.0539  | 0.078  | 0.057  |
| H4       | 0.091  | 0.073  | 0.121         | 0.0767  | 0.084  | 0.079  | 0.103         | 0.0616  | 0.087  | 0.076  |
| DMM      |        |        |               |         |        |        |               |         |        |        |
| O1       | 0.208  | 0.196  | -0.532        | -0.1505 | -0.022 | 0.041  | -0.551        | -0.1742 | 0.093  | 0.118  |
| O2       | 0.215  | 0.202  | -0.531        | -0.1493 | -0.019 | 0.040  | -0.551        | -0.1735 | 0.098  | 0.121  |
| C1       | -0.066 | 0.052  | 0.043         | -0.0138 | -0.160 | 0.082  | 0.066         | -0.0272 | -0.113 | 0.067  |
| C2       | -0.050 | 0.054  | 0.379         | 0.0880  | -0.109 | 0.060  | 0.395         | 0.0766  | -0.080 | 0.057  |
| C3       | -0.068 | 0.051  | 0.071         | -0.0135 | -0.157 | 0.085  | 0.094         | -0.0270 | -0.113 | 0.068  |
| H1       | 0.112  | 0.063  | 0.075         | 0.0425  | 0.183  | 0.084  | 0.045         | 0.0278  | 0.148  | 0.074  |
| H2       | 0.113  | 0.064  | 0.078         | 0.0423  | 0.179  | 0.082  | 0.049         | 0.0276  | 0.146  | 0.073  |
| H3       | 0.095  | 0.055  | 0.070         | 0.0402  | 0.184  | 0.089  | 0.042         | 0.0258  | 0.139  | 0.072  |
| H4       | 0.092  | 0.051  | 0.097         | 0.0501  | 0.152  | 0.077  | 0.072         | 0.0373  | 0.122  | 0.064  |
| H5       | 0.083  | 0.054  | 0.091         | 0.0372  | 0.213  | 0.096  | 0.061         | 0.0222  | 0.148  | 0.075  |
| H6       | 0.095  | 0.055  | 0.071         | 0.0401  | 0.191  | 0.092  | 0.042         | 0.0254  | 0.143  | 0.074  |
| H7       | 0.090  | 0.050  | 0.097         | 0.0503  | 0.160  | 0.081  | 0.072         | 0.0372  | 0.125  | 0.065  |
| H8       | 0.080  | 0.052  | 0.091         | 0.0375  | 0.206  | 0.094  | 0.062         | 0.0229  | 0.143  | 0.073  |
| MMF      |        |        |               |         |        |        |               |         |        |        |
| O1       | 0.045  | 0.059  | -0.439        | -0.0866 | 0.065  | 0.105  | -0.450        | -0.1031 | 0.055  | 0.082  |
| O2       | 0.039  | 0.048  | -0.585        | -0.1983 | 0.007  | 0.041  | -0.589        | -0.2072 | 0.023  | 0.045  |
| C1       | 0.194  | 0.191  | 0.139         | 0.0303  | 0.203  | 0.162  | 0.099         | -0.0050 | 0.198  | 0.176  |
| C2       | 0.094  | 0.122  | -0.141        | -0.0673 | 0.063  | 0.101  | -0.157        | -0.0897 | 0.079  | 0.112  |
| C3       | 0.112  | 0.121  | -0.170        | -0.0649 | 0.109  | 0.119  | -0.192        | -0.0889 | 0.111  | 0.120  |
| C4       | 0.141  | 0.150  | 0.327         | 0.0664  | 0.141  | 0.124  | 0.299         | 0.0390  | 0.141  | 0.137  |
| C5       | 0.002  | 0.029  | 0.076         | 0.0187  | 0.032  | 0.046  | 0.072         | 0.0112  | 0.017  | 0.037  |
| C6       | -0.011 | 0.012  | 0.061         | -0.0250 | -0.008 | 0.015  | 0.063         | -0.0277 | -0.010 | 0.014  |
| H1       | 0.086  | 0.069  | 0.119         | 0.0772  | 0.077  | 0.072  | 0.102         | 0.0632  | 0.082  | 0.070  |
| H2       | 0.077  | 0.055  | 0.109         | 0.0656  | 0.067  | 0.049  | 0.095         | 0.0552  | 0.072  | 0.052  |
| H3       | 0.078  | 0.055  | 0.107         | 0.0656  | 0.073  | 0.057  | 0.092         | 0.0544  | 0.075  | 0.056  |
| H4       | 0.047  | 0.028  | 0.106         | 0.0466  | 0.062  | 0.038  | 0.095         | 0.0400  | 0.055  | 0.033  |
| H5       | 0.020  | 0.012  | 0.079         | 0.0395  | 0.024  | 0.014  | 0.074         | 0.0369  | 0.022  | 0.013  |
| H6       | 0.020  | 0.013  | 0.099         | 0.0494  | 0.020  | 0.014  | 0.095         | 0.0467  | 0.020  | 0.014  |
| H7       | 0.041  | 0.026  | 0.118         | 0.0582  | 0.051  | 0.033  | 0.109         | 0.0523  | 0.046  | 0.029  |
| H8       | 0.015  | 0.010  | 0.095         | 0.0264  | 0.014  | 0.010  | 0.092         | 0.0244  | 0.014  | 0.010  |
| Methanol |        |        |               |         |        |        |               |         |        |        |
| C        | -0.014 | 0.128  | 0.040         | -0.0046 | -0.026 | 0.121  | 0.044         | -0.0295 | -0.020 | 0.124  |
| O        | 0.509  | 0.448  | -0.538        | -0.2318 | -0.222 | 0.199  | -0.567        | -0.2966 | 0.143  | 0.324  |
| H1       | 0.092  | 0.062  | 0.102         | 0.0522  | 0.071  | 0.052  | 0.085         | 0.0409  | 0.081  | 0.057  |
| H2       | 0.157  | 0.118  | 0.096         | 0.0523  | 0.141  | 0.087  | 0.067         | 0.0319  | 0.149  | 0.102  |
| H3       | 0.162  | 0.122  | 0.095         | 0.0516  | 0.129  | 0.082  | 0.066         | 0.0312  | 0.146  | 0.102  |
| H4       | 0.094  | 0.123  | 0.305         | 0.1809  | 0.906  | 0.459  | 0.205         | 0.1226  | 0.500  | 0.291  |
| Water    |        |        |               |         |        |        |               |         |        |        |
| O        | 0.697  | 0.639  | -0.456        | -0.2482 | -0.242 | 0.287  | -0.502        | -0.3408 | 0.227  | 0.463  |
| H1       | 0.152  | 0.181  | 0.278         | 0.1743  | 0.621  | 0.357  | 0.201         | 0.1206  | 0.387  | 0.269  |
| H2       | 0.152  | 0.181  | 0.278         | 0.1743  | 0.621  | 0.356  | 0.201         | 0.1206  | 0.386  | 0.269  |

Table S7. DFT total energies of molecules calculated with PBE/DZP method using supercells in vacuum and methanol solvent environments (Met-25 and Met-40) and with B3LYP/6-311+G\* method using clusters in vacuum and solvent environments without and with zero-point correction (ZPC) and thermal correction (TC). The energy differences of  $\Delta E_1$  and  $\Delta E_2$  are referred to the reaction energies for  $C_4H_4O + C_3H_8O_2 \rightarrow C_6H_8O_2 + CH_3OH$  and  $C_6H_8O_2 + H_2O \rightarrow C_6H_{10}O_3$ , respectively.

| PBE/DZP (eV)               | Furan ( $C_4H_4O$ ) | DMM ( $C_3H_8O_2$ ) | MET ( $CH_3OH$ ) | MMF ( $C_6H_8O_2$ ) | Water ( $H_2O$ ) | MLA ( $C_6H_{10}O_3$ ) | solvent       | $\Delta E_1$ (kJ/mol) | $\Delta E_2$ (kJ/mol) |
|----------------------------|---------------------|---------------------|------------------|---------------------|------------------|------------------------|---------------|-----------------------|-----------------------|
| Vacuum                     | -1116.511504        | -1461.958595        | -653.232490      | -1925.012689        | -466.607448      | -2393.240475           |               | 21.716                | -156.442              |
| Solvent                    | -17477.691119       | -17821.743282       | -17013.583295    | -18286.135812       | -16820.541130    | -18755.880581          | -16353.896127 | -27.488               | -299.279              |
|                            | -27281.240279       | -27626.745245       | -26817.649889    | -28090.375946       | -26630.528813    | -28558.180946          | -26163.836435 | -3.892                | -107.422              |
| <b>B3LYP/6-311+G* (Ha)</b> |                     |                     |                  |                     |                  |                        |               |                       |                       |
| DFT                        | -230.082826         | -269.633227         | -115.755316      | -383.958677         | -76.444553       | -460.459392            |               | 5.412                 | -147.550              |
| Energy                     | -230.089110         | -269.641666         | -115.765187      | -383.968136         | -76.459057       | -460.484793            |               | -6.691                | -151.328              |
|                            | -229.939961         | -269.399847         | -115.649704      | -383.689360         | -76.399303       | -460.138118            |               | 1.954                 | -129.930              |
| Corrected                  | 0.069568            | 0.113422            | 0.051143         | 0.130852            | 0.021208         | 0.155788               |               |                       |                       |
| Energy                     | 0.073297            | 0.119958            | 0.054469         | 0.138465            | 0.024042         | 0.165486               |               |                       |                       |
| ZPC                        | -229.946198         | -269.409095         | -115.660241      | -383.699260         | -76.414159       | -460.163326            |               | -11.055               | -131.117              |
| ZPC                        | 0.069604            | 0.112984            | 0.050752         | 0.130603            | 0.021032         | 0.155888               |               |                       |                       |
| TC                         | 0.073308            | 0.119587            | 0.054194         | 0.138273            | 0.023866         | 0.165579               |               |                       |                       |

Table S8. Harmonic frequencies (unit:  $\text{cm}^{-1}$ ) along the normal modes and symmetry in furan, calculated with B3LYP/6-311+G\* in comparison with the previous calculation and experiment.

| Mode       | Symmetry       | This work | MP2/cc-PVTZ <sup>a</sup> | Exp. <sup>b</sup> |
|------------|----------------|-----------|--------------------------|-------------------|
| $\nu_1$    | A <sub>1</sub> | 3282.840  | 3325.5                   | 3169.4            |
| $\nu_2$    | A <sub>1</sub> | 3248.905  | 3300.5                   | 3139.84           |
| $\nu_3$    | A <sub>1</sub> | 1509.751  | 1510.1                   | 1490.55           |
| $\nu_4$    | A <sub>1</sub> | 1412.854  | 1421.4                   | 1384.51           |
| $\nu_5$    | A <sub>1</sub> | 1165.745  | 1165.5                   | 1140.2            |
| $\nu_6$    | A <sub>1</sub> | 1083.103  | 1114.3                   | 1067.22           |
| $\nu_7$    | A <sub>1</sub> | 1012.600  | 1025.7                   | 994.68            |
| $\nu_8$    | A <sub>1</sub> | 887.224   | 878.8                    | 870.43            |
| $\nu_9$    | A <sub>2</sub> | 870.994   | 868.2                    | 864               |
| $\nu_{10}$ | A <sub>2</sub> | 721.437   | 726.4                    | 721.5             |
| $\nu_{11}$ | A <sub>2</sub> | 610.875   | 613.4                    | 599.6             |
| $\nu_{12}$ | B <sub>1</sub> | 834.438   | 838.7                    | 837.59            |
| $\nu_{13}$ | B <sub>1</sub> | 748.526   | 761.3                    | 744.65            |
| $\nu_{14}$ | B <sub>1</sub> | 617.769   | 631.7                    | 602.85            |
| $\nu_{15}$ | B <sub>2</sub> | 3277.013  | 3318.2                   | 3160.75           |
| $\nu_{16}$ | B <sub>2</sub> | 3238.049  | 3290.2                   | 3130.15           |
| $\nu_{17}$ | B <sub>2</sub> | 1591.085  | 1578.1                   | 1557.5            |
| $\nu_{18}$ | B <sub>2</sub> | 1289.070  | 1292.2                   | 1266.7            |
| $\nu_{19}$ | B <sub>2</sub> | 1195.650  | 1248.4                   | 1180.97           |
| $\nu_{20}$ | B <sub>2</sub> | 1058.382  | 1066.4                   | 1042.5            |
| $\nu_{21}$ | B <sub>2</sub> | 894.929   | 884.3                    | 873               |

<sup>a</sup> A. Mellouki, J. Liévin, M. Herman, *Chem. Phys.* 271 (2001) 239–266.

<sup>b</sup> T. D. Klots, R. D. Chirico, W. V. Steele, *Spectrochim. Acta* 50A (1994) 765;

A. Mellouki, M. Herman, J. Demaison, B. Lemoine, L. Margulés, *J. Mol. Spectrosc.* 198 (1999) 348.

Table S9. Harmonic frequencies ( $\omega$ ) in DMM, MMF, and MLA, calculated with B3LYP/6-311+G\* and cluster modeling.

| DMM |                              | MMF |                              | MLA |                              |
|-----|------------------------------|-----|------------------------------|-----|------------------------------|
| No  | $\omega$ (cm <sup>-1</sup> ) | No  | $\omega$ (cm <sup>-1</sup> ) | No  | $\omega$ (cm <sup>-1</sup> ) |
| 1   | 0.000                        | 1   | 0.000                        | 1   | 0.000                        |
| 2   | 0.000                        | 2   | 0.000                        | 2   | 0.000                        |
| 3   | 0.000                        | 3   | 0.000                        | 3   | 0.000                        |
| 4   | 0.000                        | 4   | 0.000                        | 4   | 0.000                        |
| 5   | 0.000                        | 5   | 0.000                        | 5   | 0.000                        |
| 6   | 0.000                        | 6   | 0.000                        | 6   | 0.000                        |
| 7   | 94.205                       | 7   | 50.226                       | 7   | 21.768                       |
| 8   | 133.190                      | 8   | 99.164                       | 8   | 24.743                       |
| 9   | 155.671                      | 9   | 145.460                      | 9   | 84.012                       |
| 10  | 206.434                      | 10  | 226.186                      | 10  | 107.993                      |
| 11  | 316.883                      | 11  | 299.517                      | 11  | 156.128                      |
| 12  | 452.720                      | 12  | 366.383                      | 12  | 170.809                      |
| 13  | 598.685                      | 13  | 457.516                      | 13  | 188.433                      |
| 14  | 924.065                      | 14  | 612.326                      | 14  | 257.781                      |
| 15  | 934.942                      | 15  | 638.106                      | 15  | 330.276                      |
| 16  | 1058.517                     | 16  | 735.385                      | 16  | 405.230                      |
| 17  | 1131.719                     | 17  | 760.523                      | 17  | 479.269                      |
| 18  | 1160.777                     | 18  | 820.374                      | 18  | 509.419                      |
| 19  | 1181.595                     | 19  | 871.908                      | 19  | 547.203                      |
| 20  | 1182.240                     | 20  | 904.949                      | 20  | 568.515                      |
| 21  | 1217.462                     | 21  | 908.881                      | 21  | 716.716                      |
| 22  | 1257.461                     | 22  | 940.972                      | 22  | 741.770                      |
| 23  | 1348.805                     | 23  | 982.163                      | 23  | 749.888                      |
| 24  | 1436.893                     | 24  | 1037.267                     | 24  | 893.932                      |
| 25  | 1476.466                     | 25  | 1103.949                     | 25  | 920.375                      |
| 26  | 1490.001                     | 26  | 1116.163                     | 26  | 995.035                      |
| 27  | 1500.052                     | 27  | 1171.472                     | 27  | 1053.645                     |
| 28  | 1501.322                     | 28  | 1181.547                     | 28  | 1057.322                     |
| 29  | 1509.292                     | 29  | 1199.193                     | 29  | 1087.215                     |
| 30  | 1520.121                     | 30  | 1235.401                     | 30  | 1135.515                     |
| 31  | 1526.874                     | 31  | 1257.313                     | 31  | 1172.981                     |
| 32  | 3000.824                     | 32  | 1334.611                     | 32  | 1202.804                     |
| 33  | 3001.682                     | 33  | 1400.850                     | 33  | 1222.737                     |
| 34  | 3017.193                     | 34  | 1423.043                     | 34  | 1252.582                     |
| 35  | 3067.706                     | 35  | 1482.268                     | 35  | 1276.654                     |
| 36  | 3070.206                     | 36  | 1489.486                     | 36  | 1358.111                     |
| 37  | 3070.474                     | 37  | 1503.510                     | 37  | 1377.536                     |
| 38  | 3132.693                     | 38  | 1519.752                     | 38  | 1398.649                     |
| 39  | 3133.058                     | 39  | 1523.303                     | 39  | 1476.425                     |
|     |                              | 40  | 1625.014                     | 40  | 1485.095                     |
|     |                              | 41  | 2990.414                     | 41  | 1490.833                     |
|     |                              | 42  | 3003.151                     | 42  | 1495.132                     |
|     |                              | 43  | 3050.396                     | 43  | 1503.364                     |
|     |                              | 44  | 3109.232                     | 44  | 1519.731                     |
|     |                              | 45  | 3124.986                     | 45  | 1520.485                     |
|     |                              | 46  | 3237.144                     | 46  | 1779.531                     |
|     |                              | 47  | 3248.507                     | 47  | 1797.916                     |
|     |                              | 48  | 3276.877                     | 48  | 3023.669                     |
|     |                              |     |                              | 49  | 3036.004                     |
|     |                              |     |                              | 50  | 3041.946                     |
|     |                              |     |                              | 51  | 3076.493                     |
|     |                              |     |                              | 52  | 3095.420                     |
|     |                              |     |                              | 53  | 3096.795                     |
|     |                              |     |                              | 54  | 3114.919                     |
|     |                              |     |                              | 55  | 3120.575                     |
|     |                              |     |                              | 56  | 3143.340                     |
|     |                              |     |                              | 57  | 3154.650                     |

Table S10. Cartesian coordinates of atoms in Furan, DMM, MMF and MLA, optimized with B3LYP/6-311+G\* and cluster modeling (unit: Å).

|              | <i>x</i> | <i>y</i> | <i>z</i> |
|--------------|----------|----------|----------|
| <b>Furan</b> |          |          |          |
| C            | 0.0000   | -1.0949  | 0.2920   |
| C            | 0.0000   | -0.7179  | -1.0128  |
| C            | 0.0000   | 0.7179   | -1.0128  |
| C            | 0.0000   | 1.0949   | 0.2920   |
| O            | 0.0000   | 0.0000   | 1.1041   |
| H            | 0.0000   | -2.0484  | 0.7941   |
| H            | 0.0000   | -1.3740  | -1.8701  |
| H            | 0.0000   | 1.3740   | -1.8701  |
| H            | 0.0000   | 2.0484   | 0.7941   |
| <b>DMM</b>   |          |          |          |
| C            | 0.5118   | -1.8442  | -0.2900  |
| C            | -0.9399  | 0.0015   | 0.0292   |
| C            | 0.5496   | 1.8292   | 0.2679   |
| O            | -0.1653  | -1.0009  | 0.6343   |
| O            | -0.1873  | 0.9944   | -0.6177  |
| H            | -1.5395  | 0.4312   | 0.8397   |
| H            | -1.5882  | -0.4205  | -0.7471  |
| H            | -0.2018  | -2.3440  | -0.9578  |
| H            | 1.0376   | -2.5955  | 0.2983   |
| H            | 1.2314   | -1.2845  | -0.8946  |
| H            | -0.1203  | 2.3379   | 0.9731   |
| H            | 1.0521   | 2.5738   | -0.3486  |
| H            | 1.2939   | 1.2605   | 0.8329   |
| <b>MMF</b>   |          |          |          |
| C            | -0.6672  | -2.0167  | -0.4442  |
| C            | 0.6688   | -2.2540  | -0.3733  |
| C            | 1.2491   | -1.0781  | 0.2031   |
| C            | 0.2277   | -0.2081  | 0.4402   |
| C            | 0.1702   | 1.1766   | 0.9942   |
| C            | -0.6395  | 2.3641   | -0.9114  |
| O            | -0.9572  | -0.7801  | 0.0443   |
| O            | 0.3962   | 2.2154   | 0.0447   |
| H            | -1.5094  | -2.5930  | -0.7913  |
| H            | 1.1779   | -3.1536  | -0.6854  |
| H            | 2.2937   | -0.8993  | 0.4110   |
| H            | -0.7984  | 1.3277   | 1.4909   |
| H            | -1.6088  | 2.5361   | -0.4238  |
| H            | -0.3837  | 3.2345   | -1.5156  |
| H            | 0.9580   | 1.3001   | 1.7385   |
| H            | -0.7246  | 1.4876   | -1.5634  |
| <b>MLA</b>   |          |          |          |
| C            | -0.1751  | 0.3334   | -1.1738  |
| C            | -1.1390  | -0.6723  | -0.5037  |
| C            | -0.4907  | -1.8532  | 0.2257   |
| C            | 0.6060   | -2.6137  | -0.4868  |
| C            | 0.7701   | 0.9917   | -0.1752  |
| C            | -0.8176  | 2.8276   | 0.0964   |
| H            | -0.7624  | 1.0697   | -1.7256  |
| H            | 0.4572   | -0.1800  | -1.8992  |
| H            | -1.7778  | -1.0952  | -1.2898  |
| H            | -1.8021  | -0.1811  | 0.2112   |
| H            | 0.3683   | -2.7760  | -1.5429  |
| H            | 0.7688   | -3.5707  | 0.0075   |
| H            | 1.5310   | -2.0307  | -0.4449  |
| H            | -1.6902  | 2.1870   | 0.2360   |
| H            | -0.7936  | 3.2143   | -0.9252  |
| H            | -0.8767  | 3.6630   | 0.7907   |
| O            | -0.8832  | -2.1710  | 1.3260   |
| O            | 1.8274   | 0.5001   | 0.1225   |
| O            | 0.4013   | 2.1505   | 0.4236   |



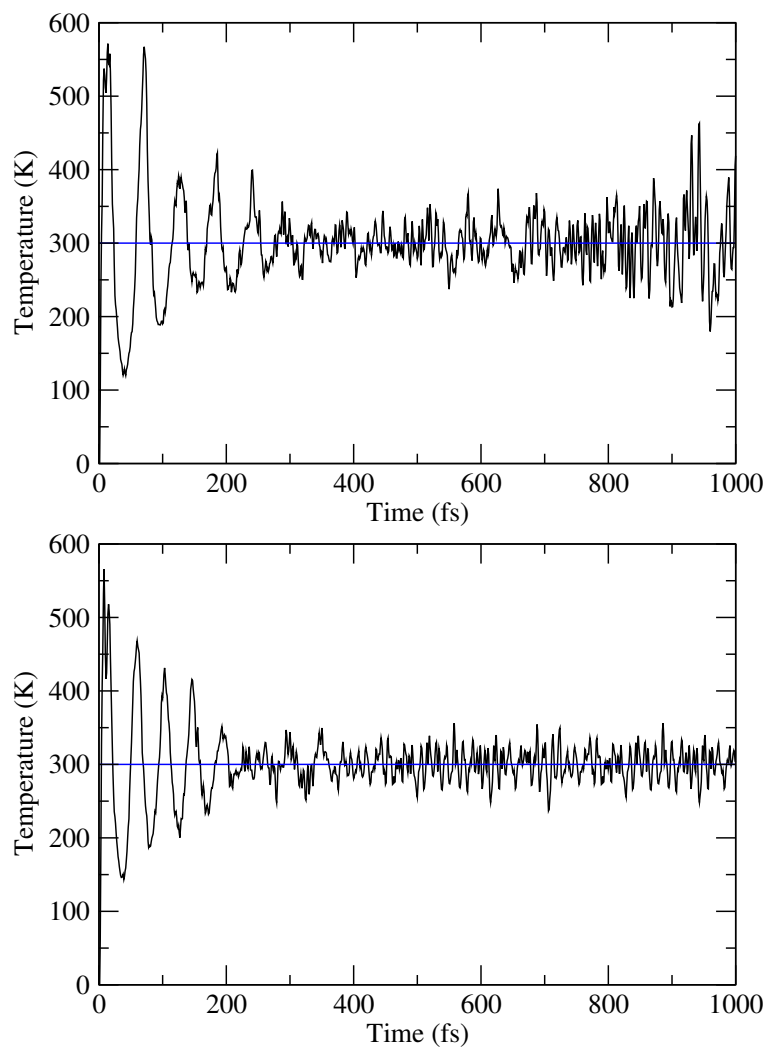

Fig. S1 Temperature fluctuation during *NVT* equilibration of 1 ps in AIMD for 25 methanol plus one furan molecules included in the supercell with a lattice constant of 12 Å (top panel) and for 40 methanol plus one furan molecules included in the supercell with a lattice constant of 14 Å (bottom panel).

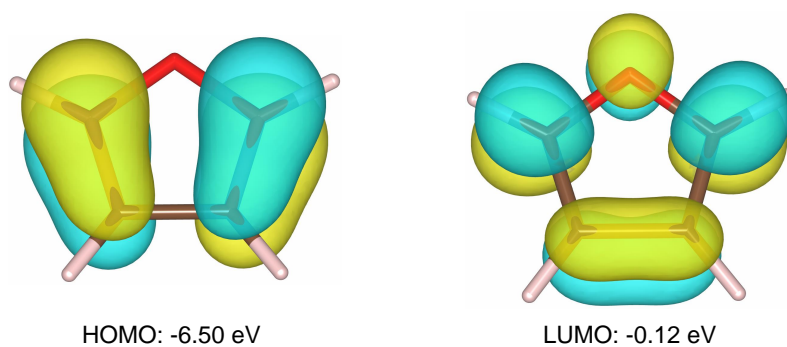

Fig. S2 HOMO and LUMO of furan.

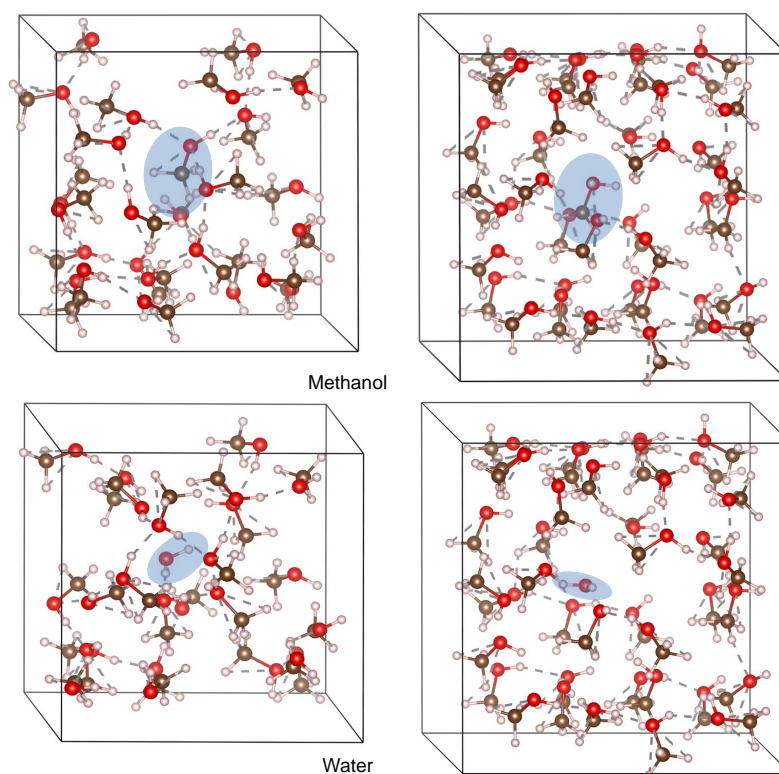

Fig. S3 Configurations of 26 and 41 methanol molecules (top panel) and 25 and 40 methanol plus one water molecules (bottom panel) included in the supercells with lattice constant of 12 and 14 Å, respectively.

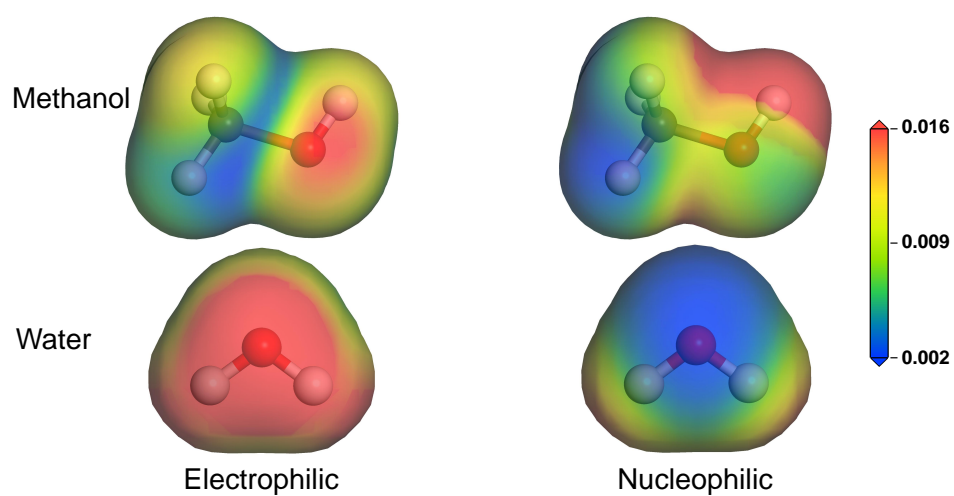

Fig. S4 Isodensity surface view of Fukui functions depicting the chemical reactivity to electrophilic and nucleophilic attack for methanol and water molecules, mapped on isosurface of total electron density at the value of  $0.2|e| \text{ \AA}^{-3}$ .

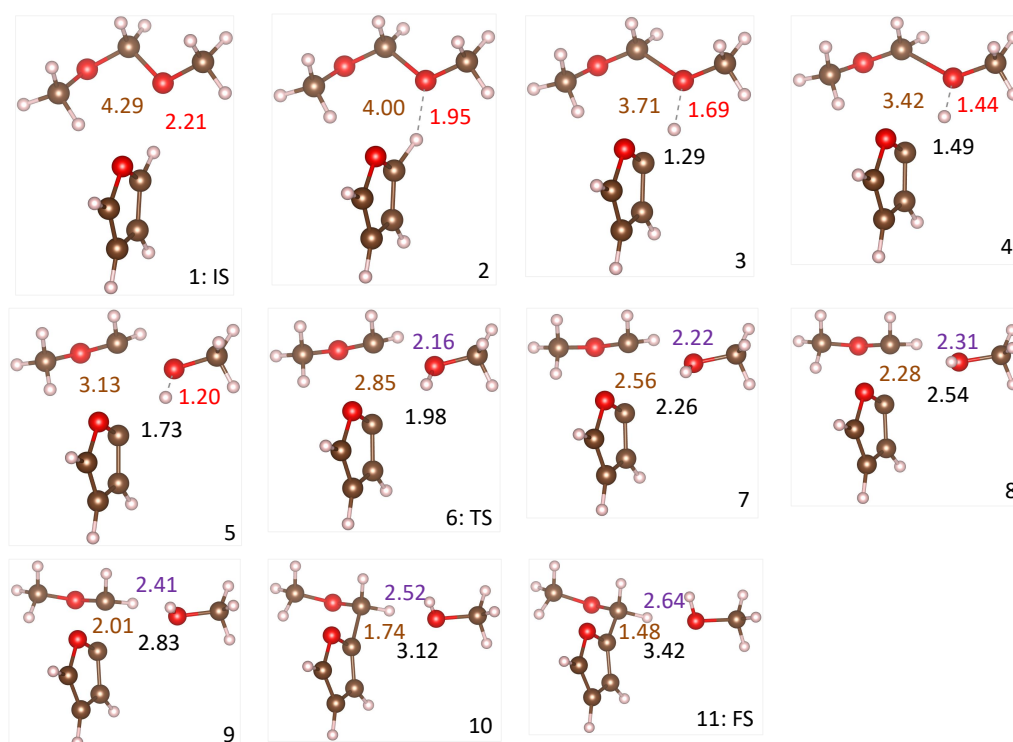

Fig. S5 Geometries of reactant or product molecules during NEB run for reaction of furan + DMM to MMF + methanol, implemented with PBE/DZP and 30 Å supercell in vacuum. IS, TS and FS mean the initial state, transition state and final state, respectively.

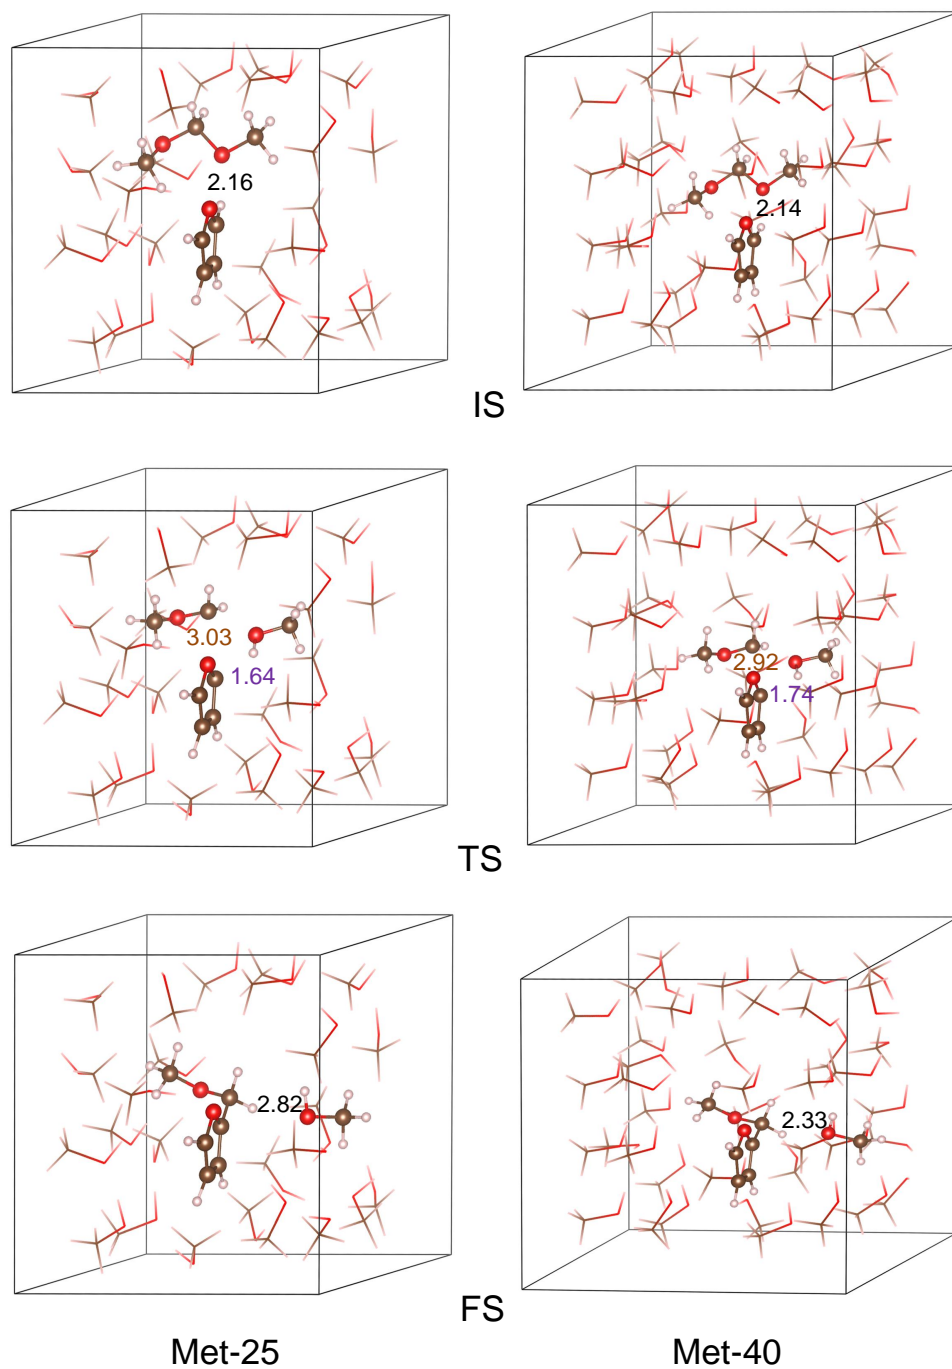

Fig. S6 Geometries of reactant or product molecules during NEB run for reaction of furan + DMM to MMF + methanol, implemented with PBE/DZP method and Met-25 and Met-40 supercell models. IS, TS and FS mean the initial state, transition state and final state, respectively.

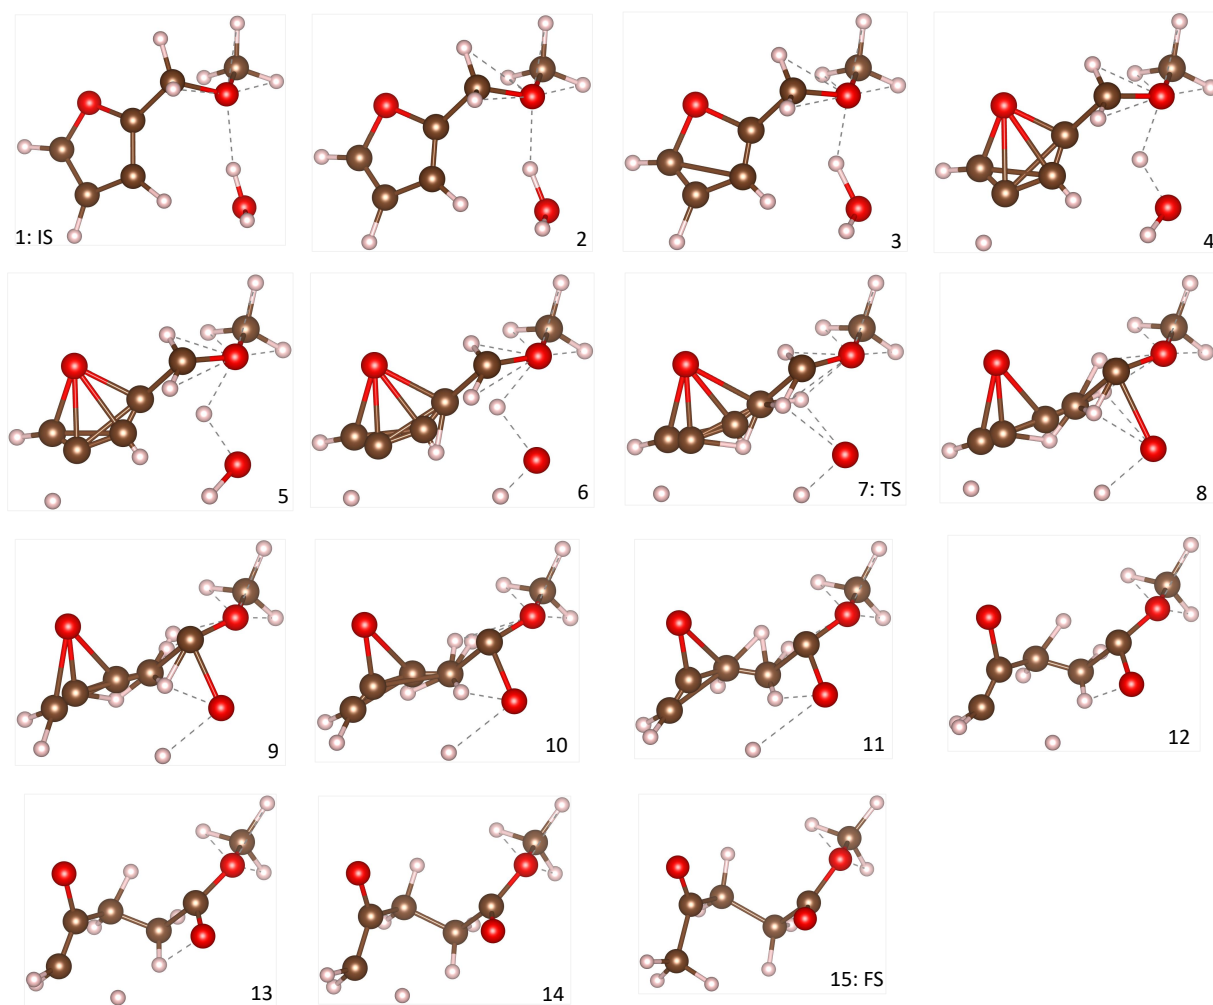

Fig. S7 Geometries of reactant or product molecules during NEB run for reaction of MMF + water to MLA, implemented with PBE/DZP and 30 Å supercell in vacuum. IS, TS and FS mean the initial state, transition state and final state, respectively.

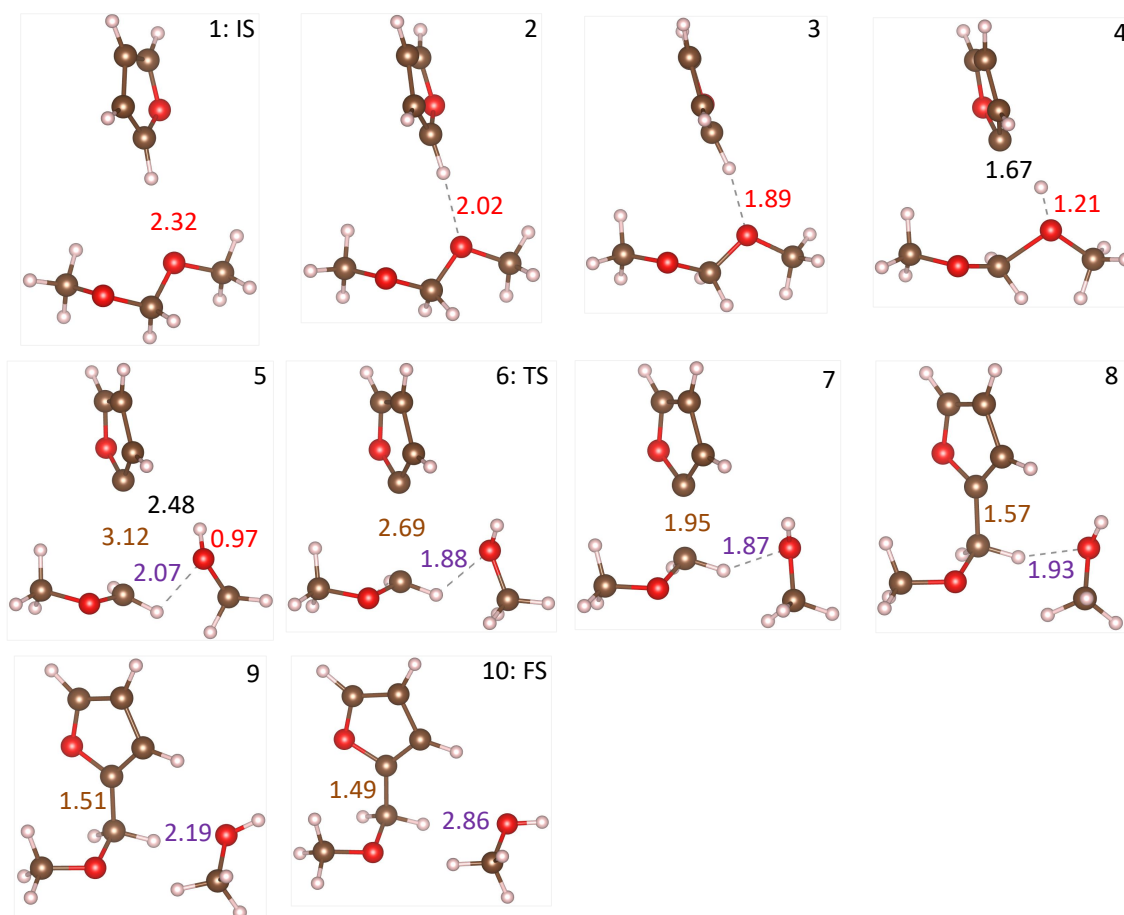

Fig. S8 Geometries of reactant or product molecules during NEB run for reaction of furan + DMM to MMF + methanol, implemented with B3LYP/6-311+G\* cluster in vacuum. IS, TS and FS mean the initial state, transition state and final state, respectively.

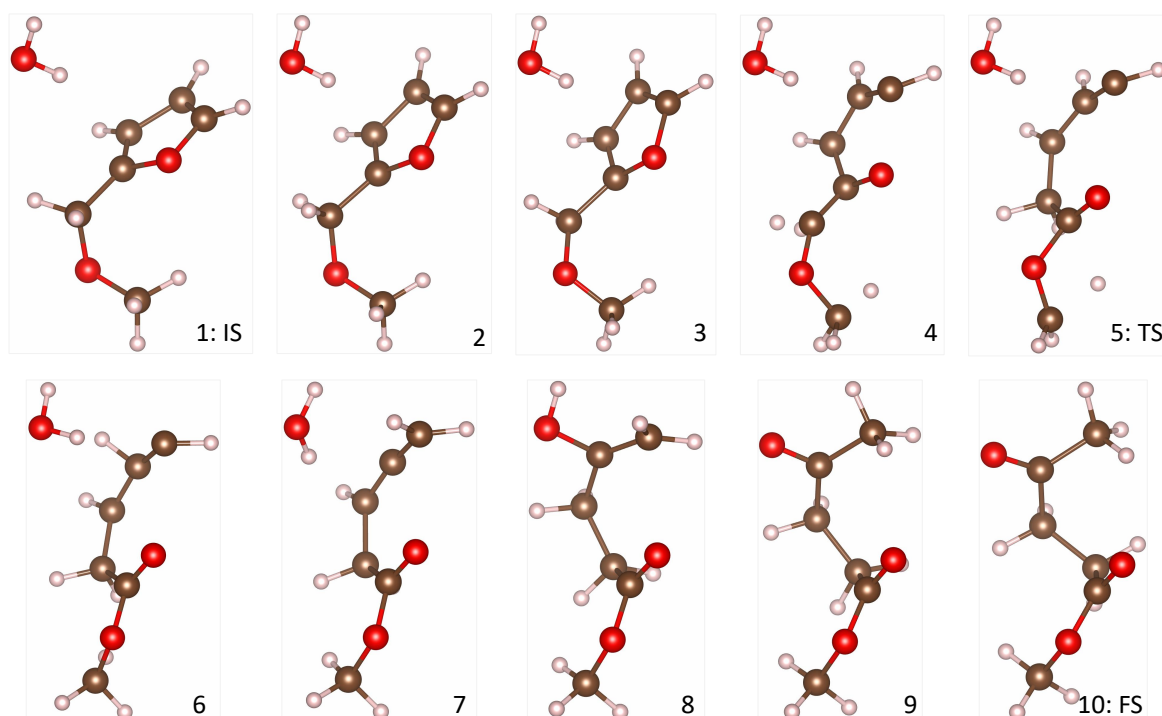

Fig. S9 Geometries of reactant or product molecules during NEB run for reaction of MMF + water to MLA, implemented with B3LYP/6-311+G\* cluster in vacuum. IS, TS and FS mean the initial state, transition state and final state, respectively.

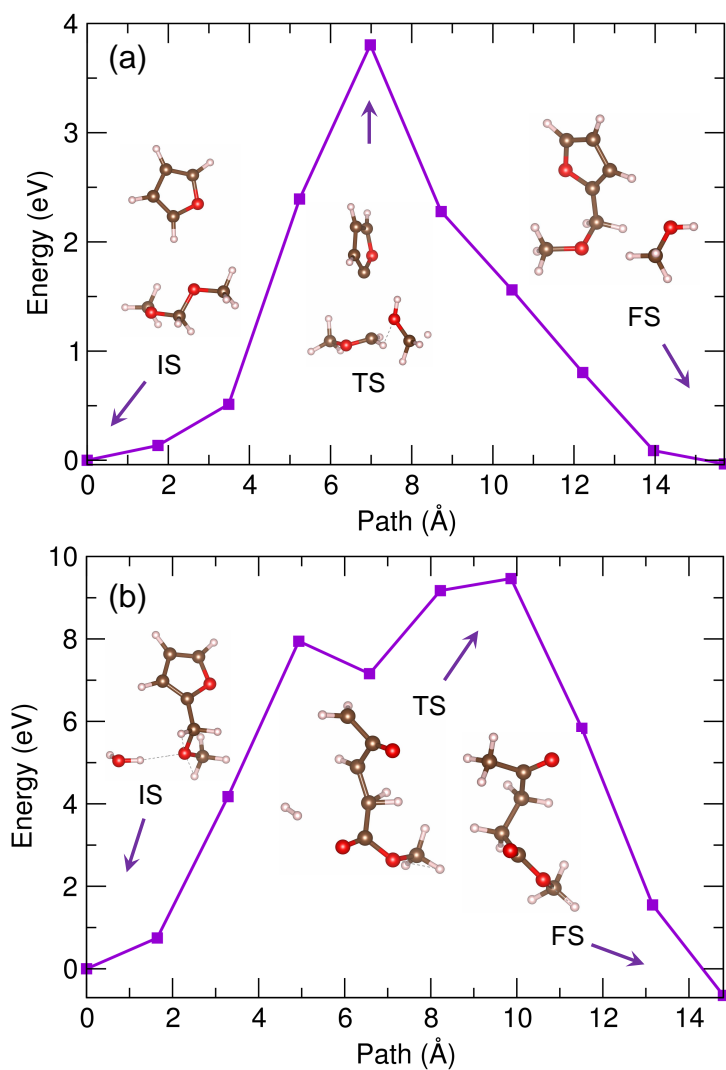

Fig. S10 Energy profile for reactions of (a) furan + DMM to MMF + methanol and (b) MMF + water to MLA calculated with PBE/6-311+G\* cluster models in vacuum environment, together with geometries of molecules corresponding to IS, TS and FS.

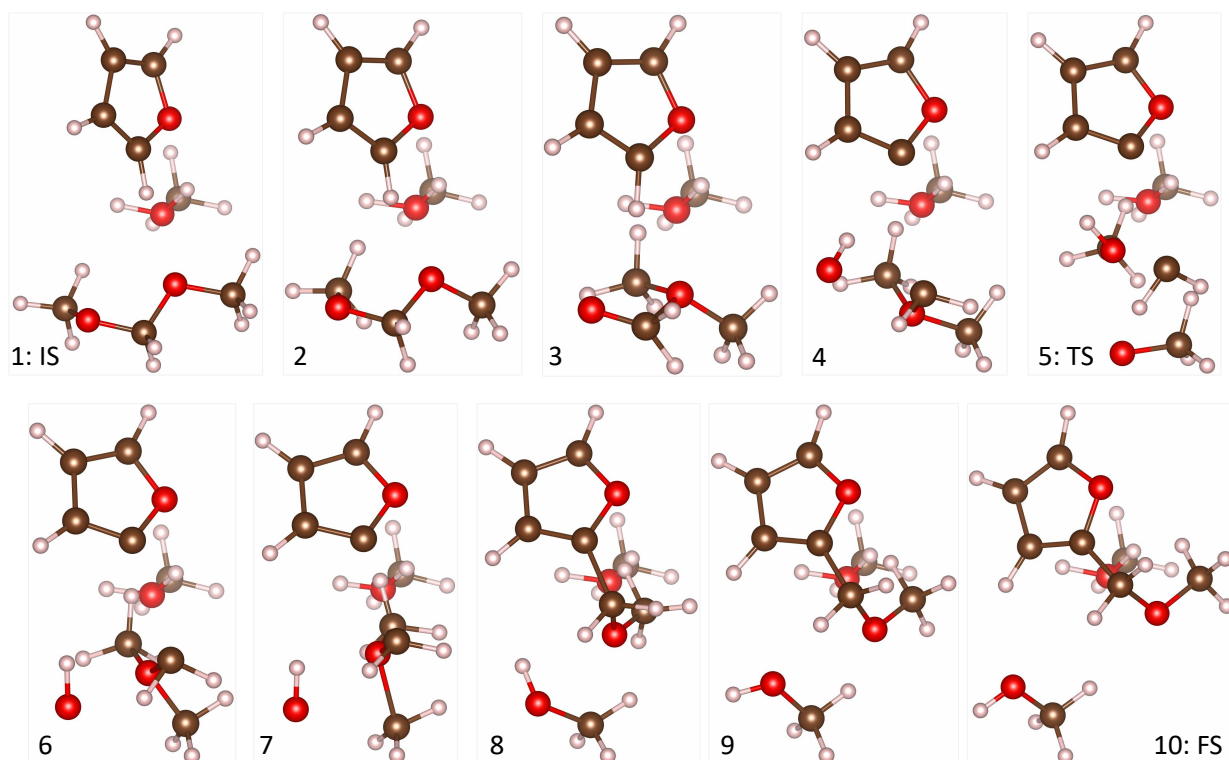

Fig. S11 Geometries of reactant or product molecules during NEB run for reaction of furan + DMM to MMF + methanol with a protonated methanol molecule, implemented with B3LYP/6-311+G\* cluster in vacuum. IS, TS and FS mean the initial state, transition state and final state, respectively.

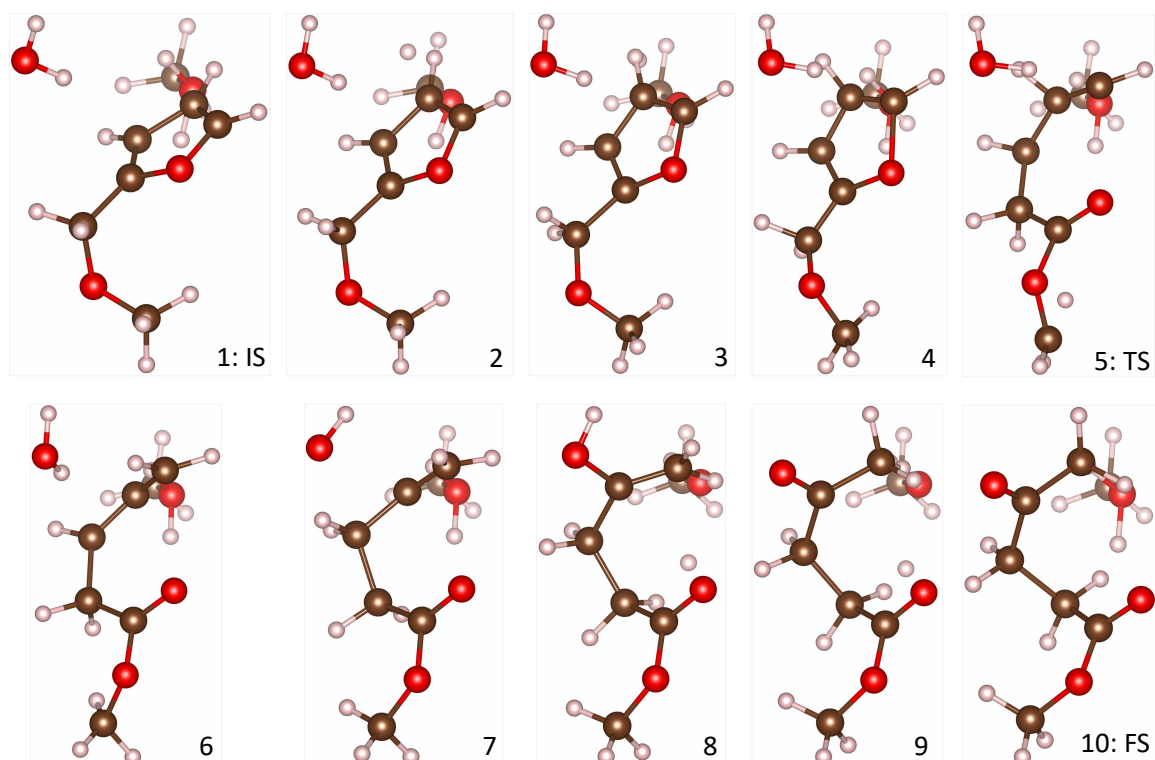

Fig. S12 Geometries of reactant or product molecules during NEB run for reaction of MMF + water to MLA with a protonated methanol molecule, implemented with B3LYP/6-311+G\* cluster in vacuum. IS, TS and FS mean the initial state, transition state and final state, respectively.
